# Supplementary material
Source: publisher site journal article supplement (https://www.dovepress.com/get_supplementary_file.php?f=194264.docx)
Supplement: Supplementary file 1 [file get_supplementary_file.php]

**SUPPLEMENTARY MATERIALS**

**Table S1** Listing of approving independent ethics committees/institutional review boards

| **Country** | **Independent ethics committees/institutional review boards** |
| --- | --- |
| **Argentina** | COMITE DE ETICA CAICI-CIAP  RODRIGUEZ 1198  Argentina |
|  | Comite de Etica Fundacion Rusculleda  Av. Velez Sarfield 562 Colón 479  Argentina |
|  | DE LAS ENFERMEDADES MENTALES  CERVIÑO 4634 5th B  Argentina |
|  | COMITE DE ETICA E INVESTIGACION-SANATORIO PROF LEON S MORRA SA  AV SAGRADA FAMILIA INTERSECTION NAZARET  Argentina |
|  | COMITE DE ETICA INSTITUCIONAL PARA LA REVISION DE ENSAYOS CLINICOS-IPEM  AZCUENAGA 1222 1st FLOOR  Argentina |
| **Australia** | HUMAN RESEARCH ETHICS COMMITTEE (TQEH/LMH/MH)  28 Woodville Road  Australia |
|  | Alfred Human Research & Ethics Committee  Alfred Hospital Commercial Rd N/A  Australia |
| **Austria** | Ethikkommission der Medizinischen Universität Innsbruck Geschäftsstelle der Ethikommission  Innrain 43 Ethikkommission der Medizinischen Universtität Innsbruck; Geschäftstelle der EK  Austria |
|  | Commissie Medische Ethiek van de Universitaire Ziekenhuizen K.U. Leuven  Innrain 43 Ethikkommission der Medizinischen Universtität Innsbruck; Geschäftstelle der EK  Austria |
| **Belgium** | Commiss+C12:C32ie Medische Ethiek van de Universitaire Ziekenhuizen K.U. Leuven  Herestraat 49  Belgium |
|  | Toetsingscommissie Ethiek UPC St-Kamillus  Krijkelberg 1 N/A N/A  Belgium |
|  | Commissie voor Medische Ethiek “Spes et Fides”  Ankerstraat 91  Belgium |
|  | Comité d'Ethique Frêres de la Charité  Rue Saint-Hubert 84 Centre Psychiatrique saint-Martin  Belgium |
|  | Sint-Franciscus Ziekenhuis  P. Paquaylaan 129  Belgium |
|  | Comité d'ethique CHR La Citadelle  Boulevard XII de Ligne 1  Belgium |
|  | Comité d'Ethique du CHP – Petit Bourgogne  Rue Professeur Mahaim 84 N/A N/A  Belgium |
|  | Commissie Medische Ethiek AZ-VUB  Laarbeeklaan 101  Belgium |
|  | Comité d’Ethique Clinique psychiatrique des Frères Alexiens  Rue Du Château De Ruyff 68  Belgium |
|  | AZ Sint-Lucas Ethisch Comité  Az Sint-Lucas Sint-Lucaslaan 29  Belgium |
|  | Comité d'Ethique ISPPC  Rue De Gozée 706  Belgium |
|  | Comité d'Ethique du CUP La Clairière  Rue Des Ardoisières 100  Belgium |
| **Brazil** | COMITE DE ETICA EM PESQUISA DA UNIVERSIDADE FEDERAL DE GOIAS COEP/UFG  PRIMEIRA AVENIDA, S/N SETOR UNIVERSITAR  Brazil |
|  | COMITE DE ETICA EM PESQUISA DO HOSPITAL UNIVERSITARIO SAO JOSE – FCMMG  ALAMEDA EZEQUIEL DIAS, 275 CENTRO  Brazil |
|  | COMITE DE ETICA EM PESQUISA DA FMUSP/HC  Rua Dr Ovídio Pires De Campos 225- Cerqueira César  Brazil |
|  | COMITE DE ETICA EM PESQUISA DA MATERNIDADE CLIMERIO DE OLIVEIRA  Rua do Limoeiro, 137 Nazaré  Brazil |
|  | TE DE ETICA EM PESQUISA DO HOSPITAL PRO CARDIACO  RUA PAULO BARRETO, 86  Brazil |
|  | CONEP - Comissao Nacional de Etica em Pesquisa  SEPN 510 NORTE BLOCO A 1º SUBSOLO - EDIFÍCIO EXINAN  Brazil |
| **Bulgaria** | Ethics Committee for MulticenterTrials  5, sq Saint Nedelya Chairman Dr Alexandar Oscar  Bulgaria |
| **China** | Beijing Anding Hospital  Ankanghutong Xicheng district, Beijing  Beijing  China |
|  | Peking University of Institute of Mental Health  No 51 Huayuanbei Road  Beijing, Beijing, 100191  China |
|  | IEC of Shanghai Mental Health Center  No 600 South Wan Ping Road  Shanghai, 200030  China |
|  | Guangzhou Brian Hospital  36 Fangcun Mingxin Road Guangzhou China N/A N/A  Guangzhou, 510370  China |
|  | The 3rd Affiliated Hospital of Sun Yatsen University  No.600, Tianhe Road,Guangzhou  Guangzhou, 510630  China |
|  | IEC of the first affiliated hospital of Kunming Medical University  No 2 Kunshi Rd Wuhua District  Kunming, Yunnan, 650032  China |
|  | IEC of Renmin Hospital of Wuhan University  No 238 Jiefang Road Wuchang District  Wuhan, Hubei, 430060  China |
|  | The Institution of Beijing Huilongguan Hospital  Huilongguan street, Changping District  Beijing, 102200  China |
|  | IEC of The Second People's Hospital, Hunan Province  No 427 The Third Block Middle Furong Road  Changsha, Hunan, 410007  China |
|  | IEC of Xi'an Mental Health center  15 Yanyin Road Qujiang New District  Xian, Shaanxi, 710061  China |
|  | IEC of The First Affiliated of Fourth Military Medical University  No 127 Changlexi Road  Xian, Shaanxi, 710032  China |
|  | Tianjin Anding Hospital  No.39, Wujiayao Road, Hexi District, Tianjin  Tianjin  China |
|  | Second Affilated Hosptial of Zhejiang Unvierstiy of Medicine  No 88 Jiefang Road  Hangzhou, Zhejiang Province, 310009  China |
|  | Nanjing Brain Hospital-IRB  No. 264, Guangzhou Road  Nanjing, 210029  China |
|  | The Institution of The mental health center of Hebei Province  No.572 East Dongfeng Road  Baoding, Hebei, 071000  China |
|  | Guangdong General Hospital  106 Zhongshan Er Road Guangzhou China NA NA  Guangzhou, 510080  China |
| **Czech Republic** | Eticka komise Nemocnice Horovice  K Nemocnici 1106 NH Hospital a.s.  Czech Republic |
|  | Eticka komise pro multicentricka klinicka hodnoceni, Fakultni nemocnice v Motole  Eticka komise pro multicentricka klinicka hodnoceni Fakultni nemocnice v Motole V uvalu 84  Czech Republic |
|  | Eticka komise Fakultni nemocnice Brno  Eticka komise Fakultni nemocnice Brno Jihlavska 20  Czech Republic |
|  | Eticka komise Nemocnice Jihlava  Vrchlickeho 59  Czech Republic |
|  | Eticka komise pri Krajske nemocnici Liberec, a.s.  Husova 10  Czech Republic |
|  | Eticka komise Okresni nemocnice Tabor  Kpt. Jarose 2000  Czech Republic |
|  | Eticka komise CLINTRIAL, s.r.o.  POCERNICKA 16  Czech Republic |
|  | Etická komise FN Motol  V Uvalu 85 N/A N/A  Czech Republic |
| **Germany** | ETHIKKOMMISSION BEI DER LANDESÄRZTEKAMMER BADEN-WÜRTTEMBERG  JAHNSTRASSE 40  Im Vogelgesang 3  Germany |
|  | Ethik-Kommission der Landesärztekammer in Hessen  Im Vogelgesang 3  Germany |
|  | ETHIK-KOMMISSION DER ÄRZTEKAMMER NORDRHEIN  Tersteegenstr 9  Germany |
|  | Ethikkommission der Aerztekammer Hamburg  Weidestr. 122b  Germany |
|  | ETHIKKOMMISSION DER ÄRZTEKAMMER WESTFALEN-LIPPE UND DER MED. FAKULTÄT DER WWU-MÜNSTER  Gartenstr. 210-214  Germany |
|  | Ethikkommission I der Medizinischen Fakultaet Heidelberg der Ruprecht-Karls-Universitaet  Alte Glockengiesserei 11/1  Germany |
|  | ETHIK-KOMMISSION DER MEDIZINISCHEN FAKULTÄT DER MARTIN-LUTHER-UNIVERSITÄT HALLE-WITTENBERG  Magdeburger Straße 8  Germany |
|  | Ethikkommission der Fakultät für Medizin der TU  Ismaninger Str. 22  Germany |
| **Greece** | National Ethics Committee  284, Mesogion Avenue Holargos  Greece |
| **Hungary** | MEDICAL RESEARCH COUNCIL ETHICS COMMITTEE FOR CLINICAL PHARMACOLOGY  Arany János Utca 6-8  Hungary |
| **Japan** | Kamitsuga General Hospital IRB  1-1033 Shimota-machi, Kanuma-City, Tochigi  Kanuma, 322-0036  Japan |
|  | Seiwakai Shoda Hospital IRB  1-16-32 Annaka, Annaka-City, Gunma  Annaka, 379-0116  Japan |
|  | Maebashi Hirosegawa Clinic IRB  2-10-9 Chiyoda-cho, Maebashi-City, Gunma  Maebashi, 371-0022  Japan |
|  | Shinozuka Hospital IRB  105-1 Shinozuka, Fujioka-City, Gunma  Fujioka, 375-0017  Japan |
|  | Kohnodai Hospital IRB, National Center for Global Health and Medicine  1-7-1 Kohnodai, Ichikawa-City, Chiba  Ichikawa, 272-8516  Japan |
|  | Sakayori Clinic IRB  2-26-3 Higashi-Oi, Shinagawa-ku, Tokyo  Tokyo, 140-0011  Japan |
|  | National Center of Neurology and Psychiatry IRB  4-1-1 Ogawa Higashi-Cho, Kodaira-City, Tokyo  Kodaira, 187-8551  Japan |
|  | Asai Dermatology Clinic IRB  1-14 Katabiracho, Hodogaya-ku, Yokohama-City, Kanagawa  Yokohama, 240-0013  Japan |
|  | Asai Dermatology Clinic IRB  1-14 Katabiracho, Hodogaya-ku, Yokohama-City, Kanagawa  Yokohama, 240-0013  Japan |
|  | Asai Dermatology Clinic IRB  1-14 Katabiracho, Hodogaya-ku, Yokohama-City, Kanagawa  Yokohama, 240-0013  Japan |
|  | Yamanashi Prefectural Kita Hospital IRB  3314-13, Kamijominamiwari, Asahi-machi, Nirasaki-City, Yamanashi  Nirasaki, 407-0046  Japan |
|  | Japanese Red Cross Society Azumino Hospital IRB  5685 Toyoshina, Azumino-City, Nagano  Azumino  Japan |
|  | Aichi Medical Association IRB  4-14-28 Sakae, Naka-ku, Nagoya-City, Aichi  Nagoya, 460-0008  Japan |
|  | Fujita Health University Hospital IRB  1-98 Dengakugakubo Kutsukake-cho, Toyoake-City, Aichi  Toyoake, 470-1192  Japan |
|  | Hinaga general center for mental care IRB  5039 Hinaga, Yokkaichi-City, Mie  Yokkaichi, 510-8575  Japan |
|  | Osaka Medical College Hospital IRB  2-7 Daigaku-Machi, Takatsuki-City, Osaka  Takatsuki, 569-8686  Japan |
|  | Kansai Medical University Takii Hospital IRB  10-15 Fumizono-Cho, Moriguchi-City, Osaka  Moriguchi, 570-8507  Japan |
|  | Nakameguro Atlas Clinic IRB  1-26-1 Kamimeguro, Meguro-ku, Tokyo  Tokyo, 153-0051  Japan |
|  | Nara Medical University Hospital IRB  840 Shijyo-cho, Kashihara-City, Nara  Kashihara, 634-8522  Japan |
|  | Hayakawa Clinic IRB  2-7-4 Hiro-obiro, Kure-City, Hiroshima  Kure, 737-0111  Japan |
|  | Yamaguchi Grand Medical Center IRB  77 Oazaosaki, Hohfu-City, Yamaguchi  Japan |
|  | Tokushima University Hospital IRB  2-50-1 Kuramoto-cho, Tokushima-City, Tokushima  Japan |
|  | Hosogi Unity Hospital IRB  100 Nishi-Machi, Kochi-City, Kochi  Japan |
|  | National Hospital Organization Hizen Psychiatric Center IRB  160 Mitsu,Yoshinogari-cho, Kanzaki-gun, Saga  Japan |
|  | Arakaki Hospital IRB  4-10-3 Ageda, Okinawa-City, Okinawa  Japan |
|  | Asakayama General Hospital IRB  3-3-16 Imaike-Cho, Sakai-ku, Sakai-City, Osaka  Japan |
|  | Aoki Hospital IRB  1-13-27 Shimonodou, Honjo-City, Saitama  Japan |
|  | Asai Dermatology Clinic IRB  1-14 Katabiracho, Hodogaya-ku, Yokohama-City, Kanagawa  Japan |
|  | Yaesu Sakuradori Clinic IRB  1-6-6 Yaesu, Chuo-ku, Tokyo  Japan |
|  | Sakayori Clinic IRB  2-26-3 Higashi-Oi, Shinagawa-ku, Tokyo  Japan |
|  | Yaesu Sakuradori Clinic IRB  1-6-6 Yaesu, Chuo-ku, Tokyo  Japan |
|  | Aoki Hospital IRB  1-13-27 Shimonodou, Honjo-City, Saitama  Japan |
|  | Nakameguro Atlas Clinic IRB  1-26-1 Kamimeguro, Meguro-ku, Tokyo  Japan |
|  | Tokyo Metropolitan Matsuzawa Hospital IRB  2-1-1 Kamikitazawa, Setagaya-ku, Tokyo  Japan |
|  | Osaka Institute of Clinical Psychiatry Shin-abuyama Hospital IRB  4-10-1 Nasahara, Takatsuki-City, Osaka  Japan |
|  | Nakameguro Atlas Clinic IRB  1-26-1 Kamimeguro, Meguro-ku, Tokyo  Japan |
|  | Nakameguro Atlas Clinic IRB  1-26-1 Kamimeguro, Meguro-ku, Tokyo  Japan |
|  | Mie University Hospital IRB  2-174 Edobashi, Tsu-City, Mie  Japan |
|  | Tokushukai Group IRB  1-8-7 Kojimachi, Chiyoda-ku, Tokyo  Japan |
|  | Takaoka Hospital IRB  5-3-8 Nishi-Imajyuku, Himeji-City, Hyogo  Japan |
| **Luxemburg** | Comité National d'Ethique de Recherche  1A-1B Rue Thomas Edison  Luxemburg |
| **Mexico** | Comite de Etica del Instituto Vida Nueva de Monterrey A.C.  Rayon 404 Sur  Mexico |
|  | Comite de Etica en Investigacion Accelerium Clnical Research  Modesto Arreola No. 917 Ote Col. Centro  Mexico |
|  | Comisiones de Etica y de Investigación de la Escuela de Medicina del Tecnológico de Monterrey  Av. Morones Prieto 3000 Pte. Col. Los Doctores Edificio CITES 3er Piso Lado Poniente  Mexico |
|  | Comité de Etica en Investigación de Grupo Medico Carracci  Carracci 107 Col. Insurgentes Extremadura  Mexico |
|  | Comités de Ética e Investigación para el Fortalecimiento de Capacidades en Salud  Convento San Juan De Los Lagos No 97 Col. Jardines de Santa Mónica  Mexico |
|  | COMITE DE ETICA E INVESTIGACION DEL HOSPITAL MEXICO AMERICANO SC  COLOMOS 2110 COL. LADRON DE GUEVARA  Mexico |
|  | Comite de Etica en Investigacion del Instituto Jaliscience de Investigacion Clinica S.A. de C.V.  Penitenciaria No. 20 Col. Centro  Mexico |
| **Portugal** | Comissão de Ética para a Investigação Científica  Parque De Saude De Lisboa AVENIDA DO BRASIL 53 PAV. 17 – A  Portugal |
| **Republic of Korea** | Chonnam National University Hospital IRB  42 Jebongro, Dong-gu Gwangju-si 501-757  Korea |
|  | Seoul National Hospital  51 Neungdong Ro Kwangjin-Gu  Korea |
|  | Korea University Ansan Hospital IRB  Korea University Ansan Hospital 123 Jeokgeum-ro, Danwon-gu  Korea |
|  | Busan Paik Hospital Inje University IRB  633-165 GaeGeum-dong, Busanjin-gu  Korea |
| **Russia** | Ethics Commitee of Research institute of mental health  Aleutskaya str. 4  Russia |
|  | Independent Interdisciplinary Committee for Ethics Expertise of Clinical Trials  51 Leningradsky prospect  Russia |
|  | Independent Ethics Committee of Bekhterev Psychoneurological Research Institute  3 Bekhterev Str  Russia |
|  | Ethics Committee of Kashenko Psychiatric hospital #1  Nikolskoye  Russia |
|  | Smolensk state medical academy of Federal agency of healthcare  28, ul.Krupskoj  Russia |
| **Spain** | CEIC Hospital de Cruces Pabelon Investigacion (detras del P de Administracion)  (epidemiologia Clinica) - Plaza De Cruces 12 SECRETARIA DEL COMITÉ ÉTICO DE INVESTIGACIÓN CLÍNICA  Spain |
|  | HOSPITAL DE DONOSTIA - SECRETARIA CEIC  Dr Beguiristain S/n CEIC del Area Sanitaria de Guipuzcoa  Spain |
|  | COMITE AUTONOMICO DE ENSAYOS CLINICOS DE ANDALUCIA  Avda De La Innovacion S/n Edificio Arena 1 CONSEJERIA DE SALUD - SECRETARIA GENERAL DE CALIDAD Y MODERNIZACION  Spain |
|  | CEIC H CLINICO SAN CARLOS  Hospital Clinico San Carlos SERVICIO DE FARMACOLOGIA CLINICA 1ª PLANTA NORTE C/ Profesor Martín Lagos s/n  Spain |
|  | CEIC HOSPITAL UNIVERSITARIO SAN JUAN DE ALICANTE  Horta San Juan De Alicante Servicio de Psiquiatría. 3ª planta norte Ctra. Alicante-Valencia s/n  Spain |
| **Taiwan** | Chang Gung Medical Foundation Institutional Review Board  B2., No.123, Dinghu Rd Guishan Township 333  Taiwan |
| **Ukraine** | Central Ethics Commission of MoH of Ukraine  5 Narodnogo Opolchennya Str N/A N/A  Ukraine |
|  | Ethics Commission of Kyiv City Clinical Pshychoneurology Hospital  103A Frunze Str NA NA  Ukraine |
|  | Ethics Commission of Kyiv City Psychoneurology Hospital # 2  8 Miropilska Str  Ukraine |
|  | Ethics Commission of the Institute of Neurology, Psychiatry and Narcology of the NAS of Ukraine  46, Acad. Pavlova Str N/A N/A  Ukraine |
|  | Ethics Commission of Kyiv City Clinical Pshychoneurology Hospital  103A Frunze Str NA NA  Ukraine |
|  | Ethics comission of Poltava regional clinical psychiatry hospital named after O.F. Maltsev  1 Medychna Str N/A N/A  Ukraine |
|  | Ethics Commission of the Crimean Republican Institution “Clinical Psychiatry Hospital #1”  27 R Luxemburg St N/A N/A  Ukraine |
|  | Ethics Commission at Odessa Regional Psychoneurological Dispensary  27, Kanatna Str N/A N/A  Ukraine |
|  | Bioethics Commission of Donetsk Regional Clinical Psychiatry Hospital  19, Odintsova Str N/A N/A  Ukraine |
|  | Ethics Commission of Municipal Institution Kherson Regional Psychiatric Hospital  65 G Hovard Street N/A N/A  Ukraine |
| **USA** | Sterling Institutional Review Board  6300 Powers Ferry Road Suite 600-351  USA |
|  | Sharp HealthCare Institutional Review Board  8695 Spectrum Center Blvd Sharp Community Medical Group  USA |
|  | Louisiana State University  1501 Kings Highway Rm 6-326  USA |

**Table S2** Demographics and clinical characteristics at the start of the open-label phase

| **Characteristic** | **Remission Positive (n=260)** | **Remission Negative (n=151)** |
| --- | --- | --- |
| Age, years, mean (SD) | 39.0 (11.9) | 39.2 (12.3) |
| Sex, n (%) |  |  |
| Male | 137 (52.7) | 78 (51.7) |
| Female | 123 (47.31) | 73 (48.3) |
| Race, n (%) |  |  |
| White | 157 (60.4) | 91 (60.3) |
| Black/African | 15 (5.8) | 5 (3.3) |
| Other | 88 (33.9) | 55 (36.4) |
| BMI, kg/m2, mean (SD) | 26.8 (4.9) | 26.1 (5.1) |
| Duration of illness since first diagnosis, years, mean (SD) | 10.2 (9.0) | 10.6 (9.1) |

Abbreviations: BMI, body mass index; SD, standard deviation.

**Figure S1** Patient disposition

**
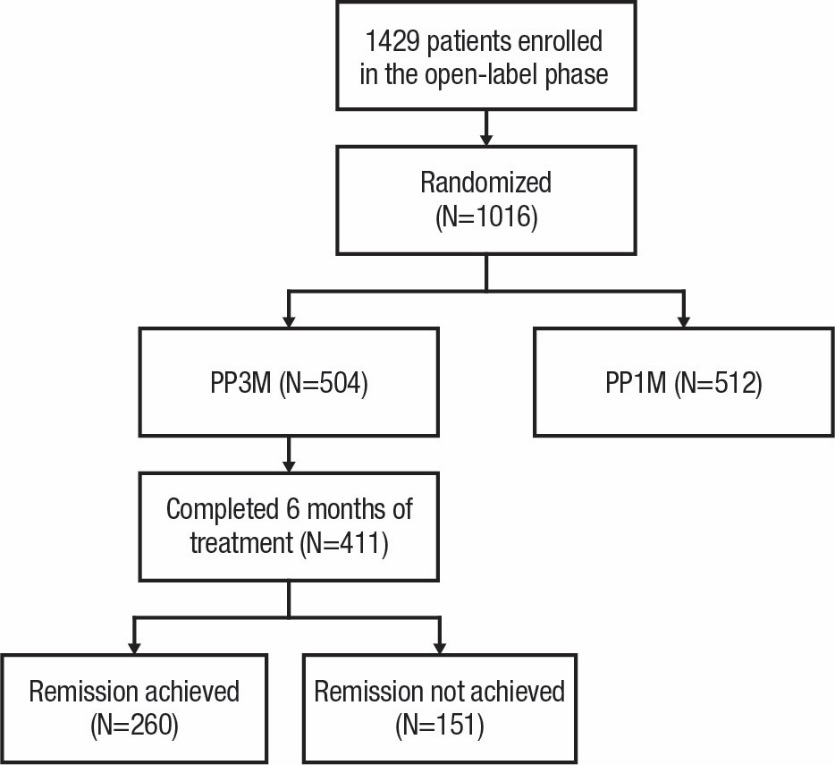
**

Remission was defined as a score of ≤3 on PANSS items P1, P2, P3, N1, N4, N6, G5 and G9, maintained for ≥6 months.

Abbreviations: PANSS, Positive and Negative Symptom Scale; PP1M, paliperidone palmitate 1-month formulation; PP3M, paliperidone palmitate 3-month formulation.
